# Supplementary material
Source: publisher figshare collection journal article supplement (https://sage.figshare.com/ndownloader/files/36255009)
Supplement: Supplementary file 1 [file 36255009]

## Supplementary Items: Study 2 Primes

### Control

#### Smartphone Recall Ongoing

Monday, Oct 10, 2016

By now, stories about Samsung Galaxy Note 7 smartphones overheating and bursting into flames have spread throughout the country. Over the past few months, Samsung has been actively searching for a remedy for their issues. The company has also been working with various organizations to provide refunds and exchanges to get the devices out of the hands of consumers.

In a statement released by the company earlier today, Samsung officially asked “all carrier and retail partners globally to stop sales and exchanges of the Galaxy Note 7 while the investigation is taking place.” This comes after most retailers and carriers have already stopped selling the Note 7.

Although the official statement did not say that Note 7 production would permanently cease, it is fairly safe to assume that production of the phone is not likely to resume.

### Campaign Trail

#### The Campaign Continues

Monday, Oct 10, 2016

By now, the unscripted speeches of Donald Trump have echoed through the halls of various venues in small and large cities across the country. Over a year has passed since Trump began his campaign for the presidency, which he officially began on June 16, 2015. Since then, his campaign trail has managed to stretch from coast to coast, having made stops throughout most of the states in the country.

After a recent speech in Wisconsin, Trump tweeted a thanks to those who turned out for the event. “Thank you to my great supporters...the crowd and enthusiasm was unreal.” After last night’s debate, Trump is set to hit the road again.

With election day being less than a month away, the Trump campaign is scheduled to continue making stops throughout the country over the next few weeks.

### Locker Room Talk

#### Locker Room Talk

Monday, Oct 10, 2016

By now, the sexually-charged comments Donald Trump made regarding women in a leaked tape have been heard by most people in the country. On the tape, recorded in 2005, Trump bragged about kissing, groping, and trying to have sex with women. “I did try and f--k her.... I moved on her like a bitch, but I couldn’t get there. And she was married,” Trump says at one point. “She’s now got the big phony tits and everything.”

At last night’s debate, Trump responded to criticism he has received for these earlier comments. “This was locker room talk ...but I have tremendous respect for women and women have respect for me,” Trump said.

In total, Trump would label his lewd remarks “locker room talk” five times in the debate, suggesting that such comments are common banter among men.
